# Supplementary material for: 5-Hydroxymethyl-2-vinylfuran: a biomass-based solvent-free adhesive
Source: Royal Society of Chemistry journal article supplement (doi:10.1039/c6gc02723g), 2016-11-11
Supplement: c6gc02723g1.pdf [file c6gc02723g1.pdf]

Supporting Information

### 5-Hydroxymethyl-2-vinylfuran: A biomass-based solvent-free adhesive

Miaomiao Han,<sup>a</sup> Xiao Liu,<sup>a,b</sup> Xiaosa Zhang,<sup>a,b</sup> Yuanyuan Pang,<sup>a,b</sup> Peng Xu,<sup>a,c</sup> Jianwei Guo,<sup>a,b</sup> Yadong Liu,<sup>a</sup> Shuangyan Zhang<sup>d</sup> and Shengxiang Ji<sup>\*a</sup>

<sup>a</sup> Key Laboratory of Polymer Ecomaterials, Changchun Institute of Applied Chemistry, Chinese Academy of Sciences, 5625 Renmin Street, Changchun 130022, P. R. China

<sup>b</sup> University of Chinese Academy of Sciences, Beijing 100039, P. R. China

<sup>c</sup> College of Chemistry and Chemical Engineering, Yangzhou University, Yangzhou, Jiangsu 225002, China

<sup>d</sup> Petroleum Production Engineering Research Institute of Huabei Oilfield Company, 041 Huizhan South Road, Renqiu, Hebei 061552, China

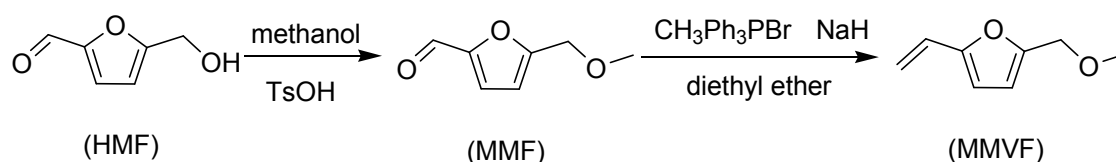

Scheme S1. Synthesis of MMVF.

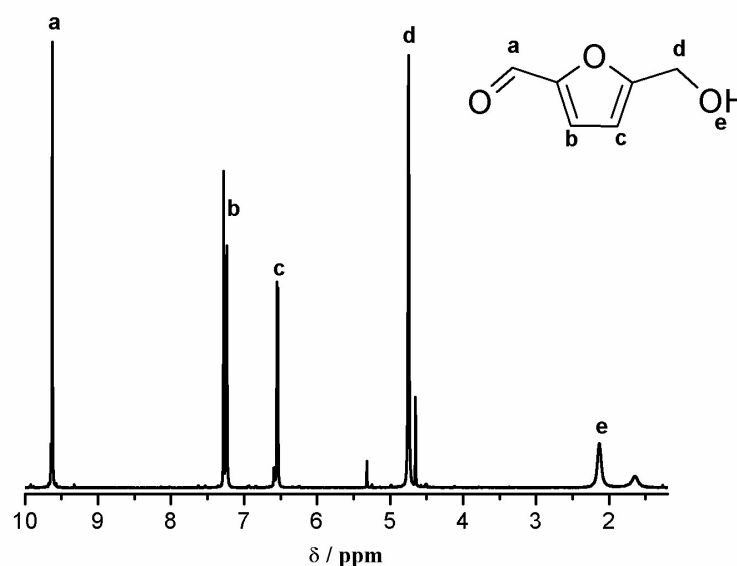

Figure S1. <sup>1</sup>H NMR spectrum of the HMF (in CDCl<sub>3</sub>, 300 MHz).

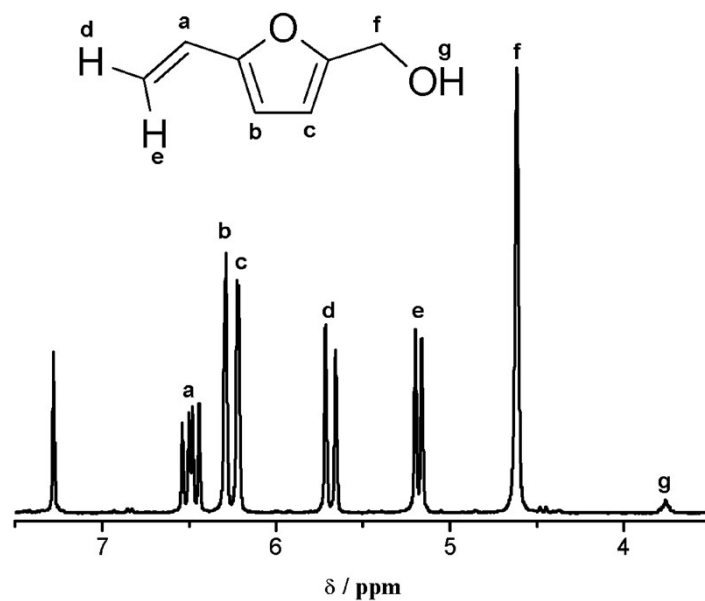

Figure S2.  $^1\text{H}$  NMR spectrum of the HMVF (in  $\text{CDCl}_3$ , 300 MHz).

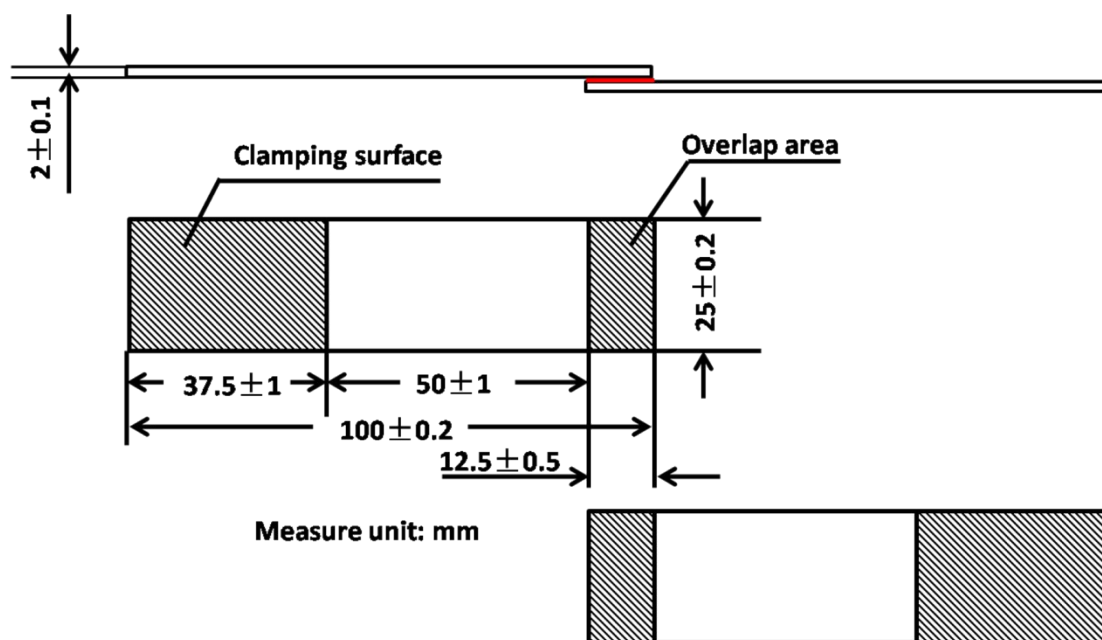

Figure S3. Schematic of the sandwiched sample for the lap shear test.

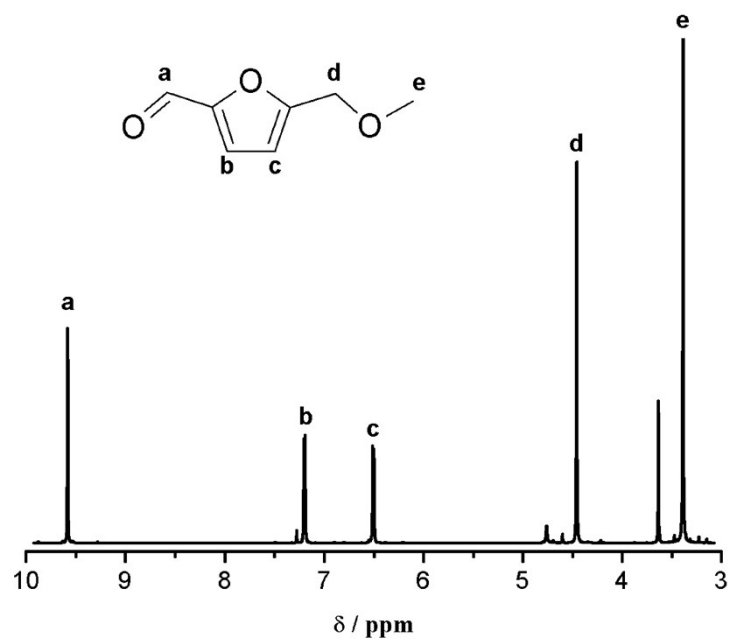

**Figure S4.** <sup>1</sup>H NMR spectrum of MMF (in CDCl<sub>3</sub>, 300 MHz).

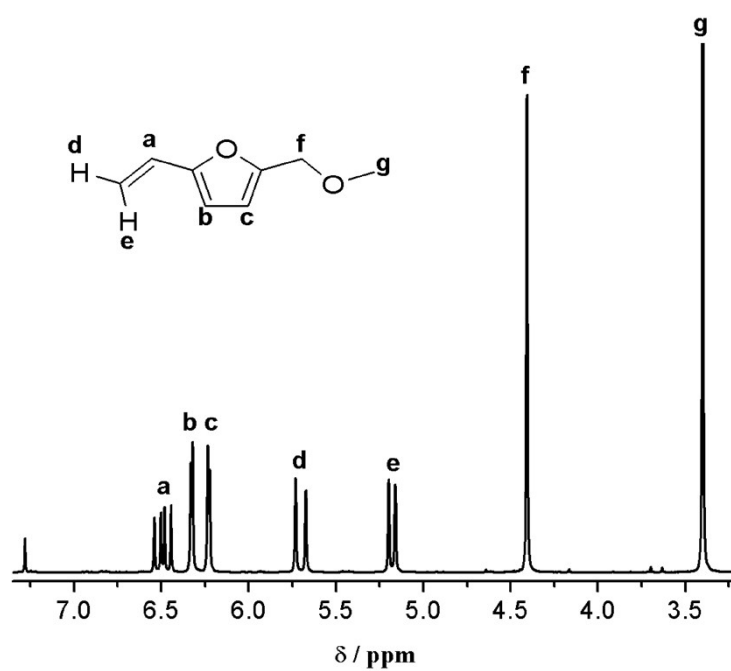

**Figure S5.** <sup>1</sup>H NMR spectrum of MMVF (in CDCl<sub>3</sub>, 300 MHz).

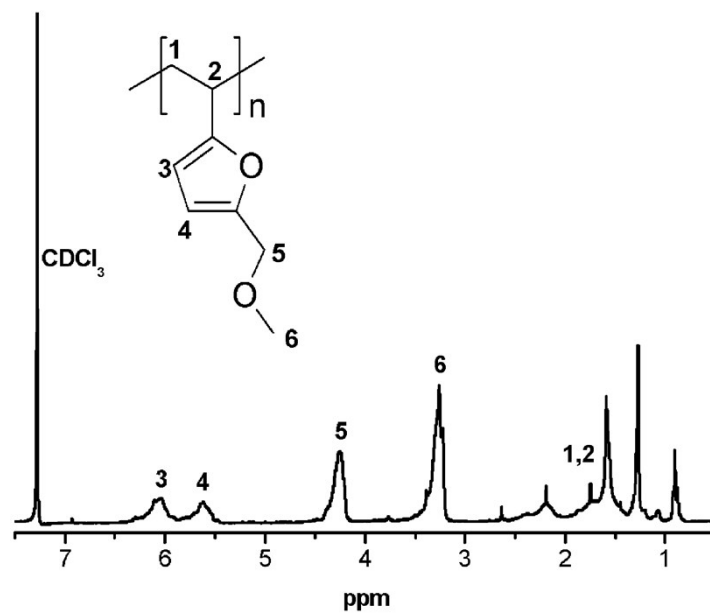

**Figure S6.**  $^1\text{H}$  NMR spectrum of PMMVF (in  $\text{CDCl}_3$ , 300 MHz).

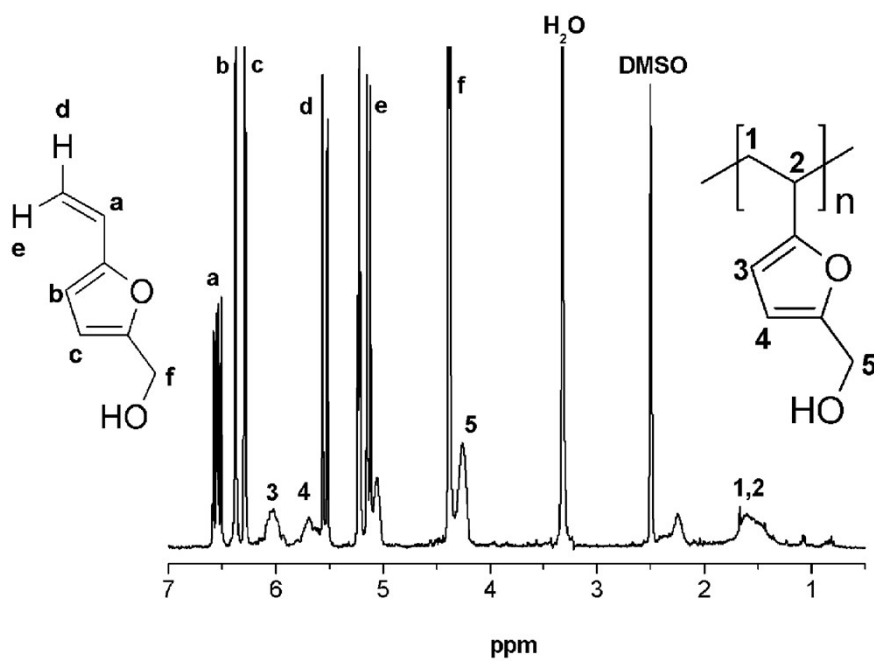

**Figure S7.**  $^1\text{H}$  NMR spectrum of PHMVf (in  $\text{DMSO}$ , 400 MHz).
